# Supplementary material for: Unterstützung der Opioidrotation mithilfe von Online-Apps
Source: Springer Nature journal article supplement (doi:10.1007/s00482-022-00683-5), 2022-12-12
Supplement: MOESM1 [file 23815718]

## Online-Zusatzmaterial

### Eingeschlossene Apps zur Umrechnung von Opioid-Analgetika

| Nr. | Name                                   | Autor:innen                                                                             | Herkunft/Weblink                                                                                                                      |
|-----|----------------------------------------|-----------------------------------------------------------------------------------------|---------------------------------------------------------------------------------------------------------------------------------------|
| 1   | Opioid Calculator                      | ANZCA/Australian and New Zealand College of Anaesthetists, FPM/Faculty of Pain Medicine | iOS App Store®                                                                                                                        |
| 2   | Orthodose                              | Dr. V. Vandenhoute                                                                      | iOS App Store®, Play Store                                                                                                            |
| 3   | Opioid Rechner                         | Grünenthal GmbH                                                                         | iOS App Store®                                                                                                                        |
| 4   | Palliative Care Tools                  | Nils Wommelsdorf                                                                        | Google Play Store®                                                                                                                    |
| 5   | Opioid Converter                       | Vikas O'Reilly-Shah                                                                     | Google Play Store®                                                                                                                    |
| 6   | Opioid Converter                       | Kirill Uryvaev                                                                          | Google Play Store®                                                                                                                    |
| 7   | pH Medical Opioid Calculators          | Philip Eagan                                                                            | iOS App Store®                                                                                                                        |
| 8   | Opioid Dosage Conversion               | Chris Marcellino MD                                                                     | iOS App Store®                                                                                                                        |
| 9   | Opiatrechner                           | Universitätsspital Basel, Spital-Pharmazie                                              | <a href="https://usb.x-service.ch/rechner/?sn=1&amp;ts=1610709350691">https://usb.x-service.ch/rechner/?sn=1&amp;ts=1610709350691</a> |
| 10  | Berechnung Äquivalenzdosen von Opiaten | Mircea Schneider                                                                        | <a href="http://www.medicalapps.ch/EQD_Op_Ger.aspx">http://www.medicalapps.ch/EQD_Op_Ger.aspx</a>                                     |
| 11  | Pain Management                        | Chronic Pain Education Group                                                            | <a href="https://www.paindata.org/calculator.php">https://www.paindata.org/calculator.php</a>                                         |

|    |                                                   |                                                    |                                                                                                                                                                                                           |
|----|---------------------------------------------------|----------------------------------------------------|-----------------------------------------------------------------------------------------------------------------------------------------------------------------------------------------------------------|
| 12 | Opioid Calculator                                 | Practical Pain Management; Remedy Health Media LLC | <a href="https://opioidcalculator.practicalpainmanagement.com/">https://opioidcalculator.practicalpainmanagement.com/</a>                                                                                 |
| 13 | Equivalent Opioid Calculator                      | CliniCalc LLC                                      | <a href="https://clincalc.com/Opioids/">https://clincalc.com/Opioids/</a>                                                                                                                                 |
| 14 | Opioid Conversion Calculator                      | Omni Calculator                                    | <a href="https://www.omnicalculator.com/health/opioid">https://www.omnicalculator.com/health/opioid</a>                                                                                                   |
| 15 | Opioid Equivalent Estimator                       | Pharmacy Joe / JosephMuench                        | <a href="https://www.pharmacyjoe.com/opioidequivalent-estimator/">https://www.pharmacyjoe.com/opioidequivalent-estimator/</a>                                                                             |
| 16 | Opioid Conversion Calculator Morphine Equivalents | Global RPH / David McAuley                         | <a href="https://globalrph.com/medcalcs/opioidpain-management-converter-advanced/">https://globalrph.com/medcalcs/opioidpain-management-converter-advanced/</a>                                           |
| 17 | Opioid Conversion Calculator                      | eviQ -Cancer Institute NSW                         | <a href="https://www.eviq.org.au/clinical-resources/eviq-calculators/3201-opioid-conversion-calculator">https://www.eviq.org.au/clinical-resources/eviq-calculators/3201-opioid-conversion-calculator</a> |
